# Supplementary material for: A de novo mutation in KRT5 in a crossbred calf with epidermolysis bullosa simplex
Source: PubMed Central journal article supplement (PMC7694802; doi:10.1111/jvim.15943), 2020-11-02
Supplement: JVIM-34-2800-s001.pdf [file JVIM-34-2800-s001.pdf]

**Supplementary Table 1.** Classification of classical EB and correspondent known causative genetic variants in domestic animals.

| Classical types of EB level of skin cleavage | EB type | Inheritance | Affected gene(s) | Targeted protein(s)             | Type of variant         | Species                       | Breed(s)                                                  | OMIA*            | References |
|----------------------------------------------|---------|-------------|------------------|---------------------------------|-------------------------|-------------------------------|-----------------------------------------------------------|------------------|------------|
| Intraepidermal                               | EBS     | AD          | <i>KRT5</i>      | Keratin 5                       | Missense                | <i>Bos taurus</i>             | Friesian-Jersey                                           | OMIA 002081-9913 | 19         |
|                                              |         | AR          | <i>PLEC</i>      | Plectin                         | Nonsense (stop-gain)    | <i>Canis lupus familiaris</i> | Eurasier                                                  | OMIA 002080-9615 | 10         |
| Junctional                                   | JEB     | AR          | <i>LAMA3</i>     | Laminin subunit alpha 3         | Nonsense (stop-gain)    | <i>Bos taurus</i>             | Belgian Blue                                              | OMIA 001677-9913 | 7          |
|                                              |         |             |                  |                                 | deletion, gross (>20)   | <i>Equus caballus</i>         | American Saddlebred                                       | OMIA 001677-9796 | 16         |
|                                              |         |             |                  |                                 | insertion, gross (>20)  | <i>Canis lupus familiaris</i> | German pointer                                            | OMIA 001677-9615 | 11         |
|                                              |         |             | <i>LAMC2</i>     | Laminin subunit gamma 2         | Deletion, gross (> 20)  | <i>Bos taurus</i>             | Hereford                                                  | OMIA 001678-9913 | 8          |
|                                              |         |             |                  |                                 | Deletion, small (<=20)  | <i>Ovis aries</i>             | German Blackheaded Mutton                                 | OMIA 001678-9940 | 15         |
|                                              |         |             |                  |                                 | Insertion, small (<=20) | <i>Equus caballus</i>         | Belgian; Italian draft horse; Trait Breton; Trait Comtois | OMIA 001678-9796 | 12, 18, 19 |
|                                              |         |             | <i>ITGB4</i>     | Integrin subunit beta 4         | Deletion, gross (> 20)  | <i>Bos taurus</i>             | Charolais                                                 | OMIA 001948-9913 | 6          |
|                                              |         |             |                  |                                 | deletion, small (<=20)  | <i>Ovis aries</i>             | Churra                                                    | OMIA 001948-9940 | 14         |
| Dermal                                       | DEB     | AR          | <i>COL7A1</i>    | Collagen type VII alpha 1 chain | Nonsense (stop-gain)    | <i>Bos taurus</i>             | Rotes Höhenvieh, Vorderwald                               | OMIA 000341-9913 | 9          |
|                                              |         |             |                  |                                 |                         | <i>Canis lupus familiaris</i> | Central Asian Shepherd                                    | OMIA 000341-9615 | 12         |
|                                              |         |             |                  |                                 | Missense                | <i>Canis lupus familiaris</i> | Golden Retriever                                          | OMIA 000341-9615 | 13         |

AD, autosomal dominant; AR, autosomal recessive. \*Online Mendelian Inheritance in Animals, <http://omia.angis.org.au/>.
