# Supplementary material for: A de novo mutation in KRT5 in a crossbred calf with epidermolysis bullosa simplex
Source: PubMed Central journal article supplement (PMC7694802; doi:10.1111/jvim.15943), 2020-11-02
Supplement: JVIM-34-2800-s002.pdf [file JVIM-34-2800-s002.pdf]

**Table S2:** EBI Accession numbers of all publicly available genome sequences.

| <b>EBI Project ID</b> | <b>EBI Sample ID</b> |
|-----------------------|----------------------|
| PRJEB18113            | SAMEA5159765         |
| PRJEB18113            | SAMEA5159766         |
| PRJEB18113            | SAMEA5159767         |
| PRJEB18113            | SAMEA5159768         |
| PRJEB18113            | SAMEA5159769         |
| PRJEB18113            | SAMEA5159770         |
| PRJEB18113            | SAMEA5159771         |
| PRJEB18113            | SAMEA5159772         |
| PRJEB18113            | SAMEA5159773         |
| PRJEB18113            | SAMEA5159774         |
| PRJEB18113            | SAMEA5159775         |
| PRJEB18113            | SAMEA5159776         |
| PRJEB18113            | SAMEA5159777         |
| PRJEB18113            | SAMEA5159778         |
| PRJEB18113            | SAMEA5159779         |
| PRJEB18113            | SAMEA5159780         |
| PRJEB18113            | SAMEA5159781         |
| PRJEB18113            | SAMEA5159782         |
| PRJEB18113            | SAMEA5159783         |
| PRJEB18113            | SAMEA5159784         |
| PRJEB18113            | SAMEA5159785         |
| PRJEB18113            | SAMEA5159786         |
| PRJEB18113            | SAMEA5159787         |
| PRJEB18113            | SAMEA5159788         |
| PRJEB18113            | SAMEA5159789         |
| PRJEB18113            | SAMEA5159790         |
| PRJEB18113            | SAMEA5159791         |
| PRJEB18113            | SAMEA5159792         |
| PRJEB18113            | SAMEA5159793         |
| PRJEB18113            | SAMEA5159794         |
| PRJEB18113            | SAMEA5159795         |
| PRJEB18113            | SAMEA5159796         |
| PRJEB18113            | SAMEA5159797         |
| PRJEB18113            | SAMEA5159798         |
| PRJEB18113            | SAMEA5159799         |
| PRJEB18113            | SAMEA5159800         |
| PRJEB18113            | SAMEA5159801         |
| PRJEB18113            | SAMEA5159802         |
| PRJEB18113            | SAMEA5159803         |
| PRJEB18113            | SAMEA5159804         |

|            |               |
|------------|---------------|
| PRJEB18113 | SAMEA5159805  |
| PRJEB18113 | SAMEA5159806  |
| PRJEB18113 | SAMEA5159807  |
| PRJEB18113 | SAMEA5159808  |
| PRJEB18113 | SAMEA5159809  |
| PRJEB18113 | SAMEA5159810  |
| PRJEB18113 | SAMEA5159811  |
| PRJEB18113 | SAMEA5159812  |
| PRJEB18113 | SAMEA5159813  |
| PRJEB18113 | SAMEA5159814  |
| PRJEB18113 | SAMEA5159815  |
| PRJEB18113 | SAMEA5159816  |
| PRJEB18113 | SAMEA5159817  |
| PRJEB18113 | SAMEA5159818  |
| PRJEB18113 | SAMEA5159819  |
| PRJEB18113 | SAMEA5159820  |
| PRJEB18113 | SAMEA5159821  |
| PRJEB18113 | SAMEA5159822  |
| PRJEB18113 | SAMEA5159823  |
| PRJEB18113 | SAMEA5159824  |
| PRJEB18113 | SAMEA5159825  |
| PRJEB18113 | SAMEA5159826  |
| PRJEB18113 | SAMEA5159827  |
| PRJEB18113 | SAMEA5159828  |
| PRJEB18113 | SAMEA5159760  |
| PRJEB18113 | SAMEA5159761  |
| PRJEB12093 | SAMEA3706825  |
| PRJEB18113 | SAMEA5415491  |
| PRJEB14604 | SAMEA4051550  |
| PRJEB18113 | SAMEA4644752  |
| PRJEB18113 | SAMEA4644757  |
| PRJEB18113 | SAMEA4644727  |
| PRJEB18113 | SAMEA4644734  |
| PRJEB18113 | SAMEA5714976  |
| PRJEB18113 | SAMEA19315168 |
| PRJEB18113 | SAMEA5415485  |
| PRJEB18113 | SAMEA6528890  |
| PRJEB18113 | SAMEA4644764  |
| PRJEB18113 | SAMEA5714974  |
| PRJEB18113 | SAMEA5159847  |
| PRJEB18113 | SAMEA5159886  |
| PRJEB18113 | SAMEA4644728  |
| PRJEB18113 | SAMEA4644749  |

|            |               |
|------------|---------------|
| PRJEB18113 | SAMEA6528886  |
| PRJEB18113 | SAMEA4644750  |
| PRJEB18113 | SAMEA6528894  |
| PRJEB18113 | SAMEA6528892  |
| PRJEB18113 | SAMEA4644762  |
| PRJEB18113 | SAMEA4644739  |
| PRJEB18113 | SAMEA4644755  |
| PRJEB18113 | SAMEA5415486  |
| PRJEB18113 | SAMEA5564716  |
| PRJEB18113 | SAMEA5564728  |
| PRJEB18113 | SAMEA19312918 |
| PRJEB18113 | SAMEA5415489  |
| PRJEB18113 | SAMEA4644763  |
| PRJEB18113 | SAMEA4644766  |
| PRJEB18113 | SAMEA19323418 |
| PRJEB18113 | SAMEA5714979  |
| PRJEB18113 | SAMEA6528889  |
| PRJEB18113 | SAMEA19313668 |
| PRJEB18113 | SAMEA4644769  |
| PRJEB18113 | SAMEA19314418 |
| PRJEB18113 | SAMEA4644754  |
| PRJEB18113 | SAMEA5159853  |
| PRJEB18113 | SAMEA4644765  |
| PRJEB18113 | SAMEA4644768  |
| PRJEB18113 | SAMEA5415488  |
| PRJEB18113 | SAMEA6528891  |
| PRJEB18113 | SAMEA5714971  |
| PRJEB18113 | SAMEA6528888  |
| PRJEB18113 | SAMEA4644741  |
| PRJEB28191 | SAMEA4827664  |
| PRJEB28191 | SAMEA4827655  |
| PRJEB18113 | SAMEA4644743  |
| PRJEB28191 | SAMEA4827671  |
| PRJEB28191 | SAMEA4827649  |
| PRJEB18113 | SAMEA5159875  |
| PRJEB28191 | SAMEA4827653  |
| PRJEB28191 | SAMEA4827657  |
| PRJEB28191 | SAMEA4827663  |
| PRJEB28191 | SAMEA4827661  |
| PRJEB28191 | SAMEA4827662  |
| PRJEB28191 | SAMEA4827658  |
| PRJEB28191 | SAMEA4827646  |
| PRJEB28191 | SAMEA4827659  |

|            |               |
|------------|---------------|
| PRJEB28191 | SAMEA4827652  |
| PRJEB28191 | SAMEA4827656  |
| PRJEB28191 | SAMEA4827669  |
| PRJEB28191 | SAMEA4827651  |
| PRJEB28191 | SAMEA4827645  |
| PRJEB28191 | SAMEA4827660  |
| PRJEB28191 | SAMEA4827650  |
| PRJEB18113 | SAMEA4644758  |
| PRJEB28191 | SAMEA4827666  |
| PRJEB18113 | SAMEA5159861  |
| PRJEB18113 | SAMEA5159862  |
| PRJEB28191 | SAMEA4827647  |
| PRJEB28191 | SAMEA4827674  |
| PRJEB28191 | SAMEA4827667  |
| PRJEB28191 | SAMEA5059742  |
| PRJEB28191 | SAMEA4827654  |
| PRJEB28191 | SAMEA4827665  |
| PRJEB28191 | SAMEA4827670  |
| PRJEB18113 | SAMEA4644740  |
| PRJEB18113 | SAMEA4644742  |
| PRJEB28191 | SAMEA4827648  |
| PRJEB28191 | SAMEA4827668  |
| PRJEB28191 | SAMEA4827673  |
| PRJEB18113 | SAMEA5159849  |
| PRJEB28191 | SAMEA4827672  |
| PRJEB18113 | SAMEA5159867  |
| PRJEB28191 | SAMEA5059748  |
| PRJEB18113 | SAMEA19318918 |
| PRJEB18113 | SAMEA5159869  |
| PRJEB18113 | SAMEA5159870  |
| PRJEB28191 | SAMEA5059741  |
| PRJEB18113 | SAMEA5415498  |
| PRJEB28191 | SAMEA5059750  |
| PRJEB28191 | SAMEA5059751  |
| PRJEB28191 | SAMEA5059747  |
| PRJEB28191 | SAMEA5059759  |
| PRJEB18113 | SAMEA5159850  |
| PRJEB28191 | SAMEA5059743  |
| PRJEB28191 | SAMEA5059754  |
| PRJEB28191 | SAMEA5059749  |
| PRJEB18113 | SAMEA5159872  |
| PRJEB28191 | SAMEA5059758  |
| PRJEB28191 | SAMEA5059752  |

|            |               |
|------------|---------------|
| PRJEB28191 | SAMEA5059745  |
| PRJEB18113 | SAMEA5159885  |
| PRJEB28191 | SAMEA5059757  |
| PRJEB28191 | SAMEA5059746  |
| PRJEB18113 | SAMEA5159873  |
| PRJEB28191 | SAMEA5059756  |
| PRJEB28191 | SAMEA5059744  |
| PRJEB28191 | SAMEA5059755  |
| PRJEB18113 | SAMEA4644756  |
| PRJEB18113 | SAMEA5159871  |
| PRJEB28191 | SAMEA5059753  |
| PRJEB18113 | SAMEA5159848  |
| PRJEB18113 | SAMEA6528893  |
| PRJEB18113 | SAMEA5159868  |
| PRJEB18113 | SAMEA4644730  |
| PRJEB18113 | SAMEA5159837  |
| PRJEB18113 | SAMEA5159843  |
| PRJEB18113 | SAMEA5714972  |
| PRJEB18113 | SAMEA6528895  |
| PRJEB18113 | SAMEA5714975  |
| PRJEB18113 | SAMEA6528887  |
| PRJEB18113 | SAMEA5564726  |
| PRJEB18113 | SAMEA5564727  |
| PRJEB18113 | SAMEA5415490  |
| PRJEB18113 | SAMEA5159874  |
| PRJEB18113 | SAMEA5159865  |
| PRJEB18113 | SAMEA5159863  |
| PRJEB18113 | SAMEA5159866  |
| PRJEB18113 | SAMEA4644735  |
| PRJEB18113 | SAMEA5159864  |
| PRJEB18113 | SAMEA19846918 |
| PRJEB18113 | SAMEA33668668 |
| PRJEB18113 | SAMEA5159835  |
| PRJEB18113 | SAMEA32999668 |
| PRJEB18113 | SAMEA32998168 |
| PRJEB18113 | SAMEA32989918 |
| PRJEB18113 | SAMEA4560538  |
| PRJEB18113 | SAMEA19847668 |
| PRJEB18113 | SAMEA19848418 |
| PRJEB18113 | SAMEA19849168 |
| PRJEB18113 | SAMEA5714967  |
| PRJEB18113 | SAMEA6528879  |
| PRJEB28191 | SAMEA6272106  |

|            |              |
|------------|--------------|
| PRJEB28191 | SAMEA6272107 |
| PRJEB28191 | SAMEA6272109 |
| PRJEB28191 | SAMEA6272110 |
| PRJEB28191 | SAMEA6272111 |
| PRJEB28191 | SAMEA6272112 |
| PRJEB28191 | SAMEA6272113 |
| PRJEB28191 | SAMEA6272114 |
| PRJEB28191 | SAMEA6272115 |
| PRJEB28191 | SAMEA6272116 |
| PRJEB28191 | SAMEA6272118 |
| PRJEB28191 | SAMEA6272119 |
| PRJEB28191 | SAMEA6272120 |
| PRJEB28191 | SAMEA6272121 |
| PRJEB28191 | SAMEA6272122 |
| PRJEB28191 | SAMEA6272123 |
| PRJEB28191 | SAMEA6272124 |
| PRJEB28191 | SAMEA6272125 |
| PRJEB28191 | SAMEA6272126 |
| PRJEB28191 | SAMEA6272127 |
| PRJEB28191 | SAMEA6163175 |
| PRJEB28191 | SAMEA6163176 |
| PRJEB28191 | SAMEA6163177 |
| PRJEB28191 | SAMEA6163178 |
| PRJEB28191 | SAMEA6163179 |
| PRJEB28191 | SAMEA6163180 |
| PRJEB28191 | SAMEA6163181 |
| PRJEB28191 | SAMEA6163182 |
| PRJEB28191 | SAMEA6163183 |
| PRJEB28191 | SAMEA6163184 |
| PRJEB28191 | SAMEA6163186 |
| PRJEB28191 | SAMEA6163187 |
| PRJEB28191 | SAMEA6163188 |
| PRJEB28191 | SAMEA6163189 |
| PRJEB28191 | SAMEA6163190 |
| PRJEB28191 | SAMEA6163191 |
| PRJEB28191 | SAMEA6163192 |
| PRJEB28191 | SAMEA6163193 |
| PRJEB28191 | SAMEA6163194 |
| PRJEB28191 | SAMEA6163195 |
| PRJEB28191 | SAMEA6272082 |
| PRJEB28191 | SAMEA6272083 |
| PRJEB28191 | SAMEA6272084 |
| PRJEB28191 | SAMEA6272085 |

|            |               |
|------------|---------------|
| PRJEB28191 | SAMEA6272086  |
| PRJEB28191 | SAMEA6272087  |
| PRJEB28191 | SAMEA6272088  |
| PRJEB28191 | SAMEA6272089  |
| PRJEB28191 | SAMEA6272090  |
| PRJEB28191 | SAMEA6272091  |
| PRJEB28191 | SAMEA6272092  |
| PRJEB28191 | SAMEA6272093  |
| PRJEB28191 | SAMEA6272094  |
| PRJEB28191 | SAMEA6272095  |
| PRJEB28191 | SAMEA6272096  |
| PRJEB28191 | SAMEA6272097  |
| PRJEB28191 | SAMEA6272098  |
| PRJEB28191 | SAMEA6272099  |
| PRJEB28191 | SAMEA6272100  |
| PRJEB28191 | SAMEA6272101  |
| PRJEB28191 | SAMEA6272102  |
| PRJEB28191 | SAMEA6272103  |
| PRJEB28191 | SAMEA6272104  |
| PRJEB28191 | SAMEA6272105  |
| PRJEB18113 | SAMEA5714968  |
| PRJEB18113 | SAMEA5714969  |
| PRJEB14604 | SAMEA4051548  |
| PRJEB18113 | SAMEA19849918 |
| PRJEB18113 | SAMEA5159890  |
| PRJEB11963 | SAMEA3682654  |
| PRJEB18113 | SAMEA4644737  |
| PRJEB18113 | SAMEA4644729  |
| PRJEB18113 | SAMEA4644732  |
| PRJEB18113 | SAMEA4644731  |
| PRJEB18113 | SAMEA19325668 |
| PRJEB18113 | SAMEA5159854  |
| PRJEB18113 | SAMEA6528904  |
| PRJEB18113 | SAMEA6528896  |
| PRJEB18113 | SAMEA4644746  |
| PRJEB18113 | SAMEA4644736  |
| PRJEB18113 | SAMEA5415500  |
| PRJEB18113 | SAMEA4560543  |
| PRJEB18113 | SAMEA5159879  |
| PRJEB18113 | SAMEA4644753  |
| PRJEB11963 | SAMEA3682653  |
| PRJEB18113 | SAMEA5415483  |
| PRJEB18113 | SAMEA5415484  |

|            |               |
|------------|---------------|
| PRJEB18113 | SAMEA4644738  |
| PRJEB18113 | SAMEA5159857  |
| PRJEB18113 | SAMEA4644748  |
| PRJEB18113 | SAMEA5159855  |
| PRJEB18113 | SAMEA19309918 |
| PRJEB18113 | SAMEA5415503  |
| PRJEB18113 | SAMEA5159859  |
| PRJEB18113 | SAMEA5159860  |
| PRJEB18113 | SAMEA4644733  |
| PRJEB18113 | SAMEA4644760  |
| PRJEB18113 | SAMEA5159840  |
| PRJEB18113 | SAMEA5415501  |
| PRJEB18113 | SAMEA5415502  |
| PRJEB18113 | SAMEA19310668 |
| PRJEB18113 | SAMEA6528905  |
| PRJEB18113 | SAMEA4644761  |
| PRJEB18113 | SAMEA5714977  |
| PRJEB18113 | SAMEA5714978  |
| PRJEB18113 | SAMEA19322668 |
| PRJEB18113 | SAMEA6528907  |
| PRJEB18113 | SAMEA6528908  |
| PRJEB18113 | SAMEA6528909  |
| PRJEB18113 | SAMEA33004168 |
| PRJEB18113 | SAMEA5159878  |
| PRJEB18113 | SAMEA5159884  |
| PRJEB18113 | SAMEA19318168 |
| PRJEB18113 | SAMEA6528906  |
| PRJEB18113 | SAMEA19317418 |
| PRJEB18113 | SAMEA5159842  |
| PRJEB18113 | SAMEA33000418 |
| PRJEB18113 | SAMEA5160152  |
| PRJEB18113 | SAMEA5159839  |
| PRJEB18113 | SAMEA5159841  |
| PRJEB18113 | SAMEA5159844  |
| PRJEB18113 | SAMEA6528899  |
| PRJEB18113 | SAMEA19311418 |
| PRJEB18113 | SAMEA19316668 |
| PRJEB18113 | SAMEA19320418 |
| PRJEB18113 | SAMEA19321168 |
| PRJEB18113 | SAMEA19321918 |
| PRJEB18113 | SAMEA4644759  |
| PRJEB18113 | SAMEA4644751  |
| PRJEB18113 | SAMEA19312168 |



|            |               |
|------------|---------------|
| PRJEB18113 | SAMEA5415492  |
| PRJEB18113 | SAMEA5415494  |
| PRJEB18113 | SAMEA5415496  |
| PRJEB18113 | SAMEA6528897  |
| PRJEB18113 | SAMEA6528902  |
| PRJEB18113 | SAMEA6528903  |
| PRJEB18113 | SAMEA5159880  |
| PRJEB18113 | SAMEA5159833  |
| PRJEB18113 | SAMEA5159882  |
| PRJEB18113 | SAMEA5159881  |
| PRJEB18113 | SAMEA5159883  |
|            | SAMN08612501  |
|            | SAMN08612529  |
|            | SAMN08612533  |
|            | SAMN08612544  |
| PRJEB18113 | SAMEA5159763  |
|            | SAMEA3390167  |
|            | SAMEA3390170  |
| PRJEB18113 | SAMEA32980918 |
| PRJEB18113 | SAMEA32981668 |
| PRJEB18113 | SAMEA32982418 |
|            | SAMEA3390189  |
|            | SAMEA3390191  |
| PRJEB18113 | SAMEA33001168 |
| PRJEB5965  | SAMEA2422242  |
| PRJEB18113 | SAMEA5159836  |
| PRJEB18113 | SAMEA19324918 |
| PRJEB18113 | SAMEA33001918 |
| PRJEB18113 | SAMEA5159845  |
| PRJEB18113 | SAMEA19852168 |
| PRJEB18113 | SAMEA19852918 |
| PRJEB18113 | SAMEA19853668 |
| PRJEB12094 | SAMEA3706829  |
| PRJEB12094 | SAMEA3706828  |
| PRJEB18113 | SAMEA4644767  |
| PRJEB18113 | SAMEA5160021  |
| PRJEB18113 | SAMEA4644726  |
| PRJEB18113 | SAMEA19864168 |
| PRJEB18113 | SAMEA19864918 |
| PRJEB18113 | SAMEA19865668 |
| PRJEB18113 | SAMEA19866418 |
| PRJEB18113 | SAMEA19867168 |
| PRJEB18113 | SAMEA19867918 |

|            |               |
|------------|---------------|
| PRJEB18113 | SAMEA19868668 |
| PRJEB18113 | SAMEA19869418 |
| PRJEB18113 | SAMEA19870168 |
| PRJEB18113 | SAMEA19871668 |
| PRJEB8226  | SAMEA3209361  |
| PRJEB7707  | SAMEA3113485  |
| PRJEB18113 | SAMEA19874668 |
| PRJEB18113 | SAMEA32983168 |
| PRJEB18113 | SAMEA32983918 |
| PRJEB18113 | SAMEA32984668 |
| PRJEB18113 | SAMEA33669418 |
| PRJEB18113 | SAMEA19875418 |
| PRJEB18113 | SAMEA32985418 |
| PRJEB18113 | SAMEA19877668 |
| PRJEB18113 | SAMEA32988418 |
| PRJEB18113 | SAMEA32990668 |
| PRJEB18113 | SAMEA32992918 |
| PRJEB18113 | SAMEA32986918 |
| PRJEB18113 | SAMEA32991418 |
| PRJEB18113 | SAMEA32992168 |
| PRJEB12092 | SAMEA3706814  |
| PRJEB12092 | SAMEA3706815  |
| PRJEB12092 | SAMEA3706816  |
| PRJEB18113 | SAMEA32987668 |
| PRJEB18113 | SAMEA32989168 |
| PRJEB18113 | SAMEA32995168 |
| PRJEB18113 | SAMEA32995918 |
| PRJEB18113 | SAMEA32996668 |
| PRJEB7528  | SAMEA2821387  |
| PRJEB7527  | SAMEA2821386  |
| PRJEB18113 | SAMEA32997418 |
| PRJEB12095 | SAMEA3706830  |
| PRJEB12094 | SAMEA3706827  |
| PRJEB18113 | SAMEA6528884  |
| PRJEB18113 | SAMEA6528883  |
| PRJEB18113 | SAMEA6528882  |
| PRJEB18113 | SAMEA6528881  |
| PRJEB18113 | SAMEA6528885  |
|            | SAMN10598557  |
|            | SAMN10598558  |
| PRJEB18113 | SAMEA5714970  |
| PRJEB18113 | SAMEA5159831  |
| PRJEB18113 | SAMEA5159830  |

|            |               |
|------------|---------------|
| PRJEB18113 | SAMEA5159829  |
| PRJEB18113 | SAMEA5564718  |
| PRJEB12093 | SAMEA3706826  |
| PRJEB18113 | SAMEA5564717  |
| PRJEB18113 | SAMEA5566449  |
| PRJEB18113 | SAMEA5564719  |
| PRJEB18113 | SAMEA5159856  |
| PRJEB18113 | SAMEA5564720  |
| PRJEB18113 | SAMEA5159762  |
| PRJEB18113 | SAMEA5159858  |
| PRJEB18113 | SAMEA5564722  |
| PRJEB18113 | SAMEA5564725  |
| PRJEB18113 | SAMEA5160153  |
| PRJEB18113 | SAMEA6528880  |
| PRJEB18113 | SAMEA4644747  |
| PRJEB18113 | SAMEA5564715  |
| PRJEB18113 | SAMEA5564713  |
| PRJEB18113 | SAMEA5564714  |
| PRJEB18113 | SAMEA5415499  |
| PRJEB18113 | SAMEA5159832  |
| PRJEB18113 | SAMEA5564711  |
| PRJEB18113 | SAMEA5564710  |
| PRJEB18113 | SAMEA5564724  |
| PRJEB18113 | SAMEA5564723  |
| PRJEB18113 | SAMEA5564721  |
| PRJEB18113 | SAMEA6528910  |
| PRJEB18113 | SAMEA4644744  |
| PRJEB18113 | SAMEA5564712  |
| PRJEB18113 | SAMEA4644745  |
| PRJEB18113 | SAMEA5159876  |
| PRJEB18113 | SAMEA5159877  |
| PRJEB18113 | SAMEA5415487  |
| PRJEB18113 | SAMEA33004918 |
| PRJEB18113 | SAMEA19309168 |
| PRJEB18113 | SAMEA19876168 |
| PRJEB18113 | SAMEA19876918 |
| PRJEB11962 | SAMEA3682652  |
| PRJEB18113 | SAMEA5159889  |
| PRJEB18113 | SAMEA5716181  |
| PRJEB18113 | SAMEA5564737  |
| PRJEB18113 | SAMEA5159888  |
| PRJEB18113 | SAMEA5564730  |
| PRJEB18113 | SAMEA5714980  |

|            |               |
|------------|---------------|
| PRJEB18113 | SAMEA5564731  |
| PRJEB18113 | SAMEA5564729  |
| PRJEB18113 | SAMEA5564735  |
| PRJEB18113 | SAMEA5159887  |
| PRJEB18113 | SAMEA5564734  |
| PRJEB18113 | SAMEA5564732  |
| PRJEB18113 | SAMEA5564733  |
| PRJEB18113 | SAMEA5714981  |
| PRJEB18113 | SAMEA5564736  |
| PRJEB5435  | SAMEA2357050  |
| PRJEB18113 | SAMEA5159846  |
|            | SAMN08473804  |
|            | SAMN09379712  |
|            | SAMN09510423  |
| PRJEB18113 | SAMEA6528901  |
| PRJEB18113 | SAMEA5415493  |
| PRJEB18113 | SAMEA5415495  |
| PRJEB18113 | SAMEA5415497  |
| PRJEB18113 | SAMEA5714973  |
| PRJEB12093 | SAMEA3706824  |
| PRJEB18113 | SAMEA19872418 |
| PRJEB18113 | SAMEA5159851  |
| PRJEB18113 | SAMEA6528898  |
| PRJEB18113 | SAMEA6528900  |
