# Supplementary material for: A de novo mutation in KRT5 in a crossbred calf with epidermolysis bullosa simplex
Source: PubMed Central journal article supplement (PMC7694802; doi:10.1111/jvim.15943), 2020-11-02
Supplement: JVIM-34-2800-s003.pdf [file JVIM-34-2800-s003.pdf]

| #CHROM | POS       | REF | ALT | GENOTYPE | EFFECT                                 | IMPACT   | GENE      | GENEID | FEATUREID      | EXON | CDNA           | PROTEIN      |
|--------|-----------|-----|-----|----------|----------------------------------------|----------|-----------|--------|----------------|------|----------------|--------------|
| 11     | 119764    | C   | T   | 0/1      | missense_variant                       | MODERATE | ZC3H6     | 506237 | XM_002707712.5 | 12   | c.3307G>A      | p.Gly1103Ser |
| 11     | 119764    | C   | T   | 0/1      | missense_variant                       | MODERATE | ZC3H6     | 506237 | XM_024999265.1 | 10   | c.2920G>A      | p.Gly974Ser  |
| 1      | 144009178 | G   | A   | 0/1      | missense_variant                       | MODERATE | AGPAT3    | 506607 | NM_001038046.1 | 3    | c.121G>A       | p.Val41Met   |
| 11     | 67182753  | G   | C   | 0/1      | missense_variant                       | MODERATE | ARHGAP25  | 534994 | NM_001046392.1 | 11   | c.1846G>C      | p.Glu616Gln  |
| 11     | 67182753  | G   | C   | 0/1      | missense_variant                       | MODERATE | ARHGAP25  | 534994 | XM_005212861.4 | 11   | c.1855G>C      | p.Glu619Gln  |
| 11     | 67182753  | G   | C   | 0/1      | missense_variant                       | MODERATE | ARHGAP25  | 534994 | XM_010810125.3 | 10   | c.1738G>C      | p.Glu580Gln  |
| 11     | 67182753  | G   | C   | 0/1      | missense_variant                       | MODERATE | ARHGAP25  | 534994 | XM_010810126.3 | 8    | c.1492G>C      | p.Glu498Gln  |
| 11     | 67182753  | G   | C   | 0/1      | missense_variant                       | MODERATE | ARHGAP25  | 534994 | XM_015473507.2 | 11   | c.1864G>C      | p.Glu622Gln  |
| 11     | 67182753  | G   | C   | 0/1      | missense_variant                       | MODERATE | ARHGAP25  | 534994 | XM_024998860.1 | 10   | c.1588G>C      | p.Glu530Gln  |
| 11     | 70586568  | G   | A   | 0/1      | missense_variant                       | MODERATE | ALK       | 536642 | XM_024999478.1 | 11   | c.1936G>A      | p.Gly646Arg  |
| 12     | 71214560  | G   | A   | 0/1      | missense_variant                       | MODERATE | LOC522174 | 522174 | XM_025000204.1 | 6    | c.707C>T       | p.Ser236Phe  |
| 13     | 2377500   | G   | A   | 0/1      | missense_variant                       | MODERATE | PLCB4     | 281985 | XM_025000316.1 | 12   | c.731G>A       | p.Ser244Asn  |
| 13     | 2377500   | G   | A   | 0/1      | missense_variant                       | MODERATE | PLCB4     | 281985 | XM_025000317.1 | 10   | c.695G>A       | p.Ser232Asn  |
| 13     | 2377500   | G   | A   | 0/1      | missense_variant                       | MODERATE | PLCB4     | 281985 | XM_025000319.1 | 11   | c.749G>A       | p.Ser250Asn  |
| 13     | 2377500   | G   | A   | 0/1      | missense_variant                       | MODERATE | PLCB4     | 281985 | XM_025000320.1 | 6    | c.302G>A       | p.Ser101Asn  |
| 13     | 65570602  | T   | G   | 0/1      | splice_donor_variant&intron_variant    | HIGH     | DLGAP4    | 520521 | XM_010811464.2 | 1    | c.85+2T>G      |              |
| 15     | 28053129  | T   | C   | 0/1      | missense_variant&splice_region_variant | MODERATE | CEP164    | 514284 | XM_015474629.2 | 13   | c.1397T>C      | p.Leu466Ser  |
| 15     | 28053129  | T   | C   | 0/1      | missense_variant&splice_region_variant | MODERATE | CEP164    | 514284 | XM_024975763.1 | 11   | c.1241T>C      | p.Leu414Ser  |
| 15     | 28053129  | T   | C   | 0/1      | missense_variant&splice_region_variant | MODERATE | CEP164    | 514284 | XM_024975764.1 | 11   | c.1232T>C      | p.Leu411Ser  |
| 15     | 28053129  | T   | C   | 0/1      | missense_variant&splice_region_variant | MODERATE | CEP164    | 514284 | XM_024975765.1 | 8    | c.851T>C       | p.Leu284Ser  |
| 15     | 28053129  | T   | C   | 0/1      | missense_variant&splice_region_variant | MODERATE | CEP164    | 514284 | XM_024975767.1 | 8    | c.842T>C       | p.Leu281Ser  |
| 16     | 35067966  | C   | G   | 0/1      | missense_variant&splice_region_variant | MODERATE | WDR64     | 783230 | NM_001205438.2 | 11   | c.1292G>C      | p.Gly431Ala  |
| 16     | 35067966  | C   | G   | 0/1      | missense_variant&splice_region_variant | MODERATE | WDR64     | 783230 | XM_024976544.1 | 12   | c.1322G>C      | p.Gly441Ala  |
| 16     | 62172664  | C   | G   | 0/1      | missense_variant                       | MODERATE | MRI       | 506206 | NM_001190298.1 | 2    | c.153C>G       | p.Ile51Met   |
| 25     | 2663294   | GCA | G   | 0/1      | frameshift_variant                     | HIGH     | LOC539468 | 539468 | XM_015460305.2 | 2    | c.644_645delCA | p.Ala215fs   |
| 25     | 2663297   | G   | GTT | 0/1      | frameshift_variant                     | HIGH     | LOC539468 | 539468 | XM_015460305.2 | 2    | c.646_647insTT | p.Ala216fs   |
| 29     | 44872199  | C   | A   | 0/1      | missense_variant                       | MODERATE | LRFN4     | 530084 | XM_005227110.4 | 2    | c.853C>A       | p.Arg285Ser  |
| 29     | 48694869  | C   | T   | 0/1      | missense_variant                       | MODERATE | SLC22A18  | 504885 | XM_005227308.4 | 10   | c.1009G>A      | p.Gly337Ser  |
| 29     | 48694869  | C   | T   | 0/1      | missense_variant                       | MODERATE | SLC22A18  | 504885 | XM_024987010.1 | 8    | c.1012G>A      | p.Gly338Ser  |
| 3      | 100074635 | C   | T   | 0/1      | missense_variant                       | MODERATE | MAST2     | 535643 | XM_003585907.4 | 25   | c.3326G>A      | p.Arg1109Gln |
| 3      | 100074635 | C   | T   | 0/1      | missense_variant                       | MODERATE | MAST2     | 535643 | XM_005204880.3 | 26   | c.3347G>A      | p.Arg1116Gln |
| 3      | 100074635 | C   | T   | 0/1      | missense_variant                       | MODERATE | MAST2     | 535643 | XM_005204883.4 | 24   | c.3071G>A      | p.Arg1024Gln |
| 3      | 100074635 | C   | T   | 0/1      | missense_variant                       | MODERATE | MAST2     | 535643 | XM_005204884.4 | 23   | c.3050G>A      | p.Arg1017Gln |
| 3      | 100074635 | C   | T   | 0/1      | missense_variant                       | MODERATE | MAST2     | 535643 | XM_005204886.4 | 23   | c.2876G>A      | p.Arg959Gln  |
| 3      | 100074635 | C   | T   | 0/1      | missense_variant                       | MODERATE | MAST2     | 535643 | XM_010803741.3 | 24   | c.2897G>A      | p.Arg966Gln  |

|   |           |      |   |     |                                     |          |                  |        |                |    |                 |              |
|---|-----------|------|---|-----|-------------------------------------|----------|------------------|--------|----------------|----|-----------------|--------------|
| 3 | 100074635 | C    | T | 0/1 | missense_variant                    | MODERATE | <i>MAST2</i>     | 535643 | XM_024990152.1 | 26 | c.3164G>A       | p.Arg1055Gln |
| 3 | 54768870  | C    | T | 0/1 | missense_variant                    | MODERATE | <i>LOC507055</i> | 507055 | XM_002686269.6 | 5  | c.541C>T        | p.Arg181Trp  |
| 3 | 54768870  | C    | T | 0/1 | missense_variant                    | MODERATE | <i>LOC507055</i> | 507055 | XM_015464659.2 | 4  | c.304C>T        | p.Arg102Trp  |
| 4 | 93400822  | C    | T | 0/1 | missense_variant                    | MODERATE | <i>SMKRI</i>     | 784270 | XM_024991157.1 | 3  | c.113C>T        | p.Ala38Val   |
| 5 | 115804850 | G    | C | 0/1 | missense_variant                    | MODERATE | <i>SMC1B</i>     | 522122 | XM_002687980.4 | 5  | c.622C>G        | p.Arg208Gly  |
| 5 | 14697177  | T    | C | 0/1 | missense_variant                    | MODERATE | <i>LRRIQ1</i>    | 781474 | XM_005206079.4 | 8  | c.2213T>C       | p.Ile738Thr  |
| 5 | 27367604  | TCAA | T | 0/1 | disruptive_inframe_deletion         | MODERATE | <i>KRT5</i>      | 281268 | NM_001008663.1 | 1  | c.534_536delCAA | p.Asn178del  |
| 5 | 27898486  | G    | A | 0/1 | missense_variant                    | MODERATE | <i>ACVR1B</i>    | 539315 | XM_024992431.1 | 2  | c.104C>T        | p.Ala35Val   |
| 5 | 29727679  | T    | C | 0/1 | missense_variant                    | MODERATE | <i>LIMA1</i>     | 540637 | NM_001192754.1 | 11 | c.2108T>C       | p.Leu703Pro  |
| 5 | 29727679  | T    | C | 0/1 | missense_variant                    | MODERATE | <i>LIMA1</i>     | 540637 | XM_005206324.4 | 11 | c.2105T>C       | p.Leu702Pro  |
| 5 | 29727679  | T    | C | 0/1 | missense_variant                    | MODERATE | <i>LIMA1</i>     | 540637 | XM_005206325.4 | 11 | c.2102T>C       | p.Leu701Pro  |
| 5 | 29727679  | T    | C | 0/1 | missense_variant                    | MODERATE | <i>LIMA1</i>     | 540637 | XM_024992054.1 | 9  | c.1241T>C       | p.Leu414Pro  |
| 5 | 83875046  | C    | T | 0/1 | missense_variant                    | MODERATE | <i>RASSF8</i>    | 515639 | XM_024991718.1 | 4  | c.817G>A        | p.Glu273Lys  |
| 7 | 27372306  | G    | A | 0/1 | stop_gained                         | HIGH     | <i>GRAMD2B</i>   | 505627 | NM_001079579.1 | 9  | c.844C>T        | p.Arg282*    |
| 7 | 27372306  | G    | A | 0/1 | stop_gained                         | HIGH     | <i>GRAMD2B</i>   | 505627 | XM_005209088.4 | 9  | c.889C>T        | p.Arg297*    |
| 7 | 5889843   | C    | A | 0/1 | splice_donor_variant&intron_variant | HIGH     | <i>MYO9B</i>     | 513493 | NM_001193096.2 | 33 | c.5254+1G>T     |              |
| 7 | 5889843   | C    | A | 0/1 | splice_donor_variant&intron_variant | HIGH     | <i>MYO9B</i>     | 513493 | XM_005208501.4 | 34 | c.5347+1G>T     |              |
| 7 | 5889843   | C    | A | 0/1 | splice_donor_variant&intron_variant | HIGH     | <i>MYO9B</i>     | 513493 | XM_010806569.3 | 34 | c.5344+1G>T     |              |
| 7 | 5889843   | C    | A | 0/1 | splice_donor_variant&intron_variant | HIGH     | <i>MYO9B</i>     | 513493 | XM_010806571.3 | 34 | c.5314+1G>T     |              |
| 7 | 5889843   | C    | A | 0/1 | splice_donor_variant&intron_variant | HIGH     | <i>MYO9B</i>     | 513493 | XM_010806573.3 | 33 | c.5257+1G>T     |              |
| 7 | 5889843   | C    | A | 0/1 | splice_donor_variant&intron_variant | HIGH     | <i>MYO9B</i>     | 513493 | XM_010806575.3 | 33 | c.5233+1G>T     |              |
| 7 | 5889843   | C    | A | 0/1 | splice_donor_variant&intron_variant | HIGH     | <i>MYO9B</i>     | 513493 | XM_024994174.1 | 33 | c.5251+1G>T     |              |
| 9 | 88398528  | C    | T | 0/1 | missense_variant                    | MODERATE | <i>AKAP12</i>    | 513774 | XM_010808687.3 | 2  | c.3611C>T       | p.Pro1204Leu |
| 9 | 88398528  | C    | T | 0/1 | missense_variant                    | MODERATE | <i>AKAP12</i>    | 513774 | XM_024997062.1 | 4  | c.3860C>T       | p.Pro1287Leu |
| 9 | 88398528  | C    | T | 0/1 | missense_variant                    | MODERATE | <i>AKAP12</i>    | 513774 | XM_024997063.1 | 2  | c.3608C>T       | p.Pro1203Leu |
